# Supplementary material for: Fine-scale differentiation between Bacillus anthracis and Bacillus cereus group signatures in metagenome shotgun data
Source: PeerJ journal article supplement (doi:10.7717/peerj.5515), 2018-08-22
Supplement: supplementary-figure-06-ba31-lod.pdf [file supplementary-figure-06-ba31-lod.pdf]

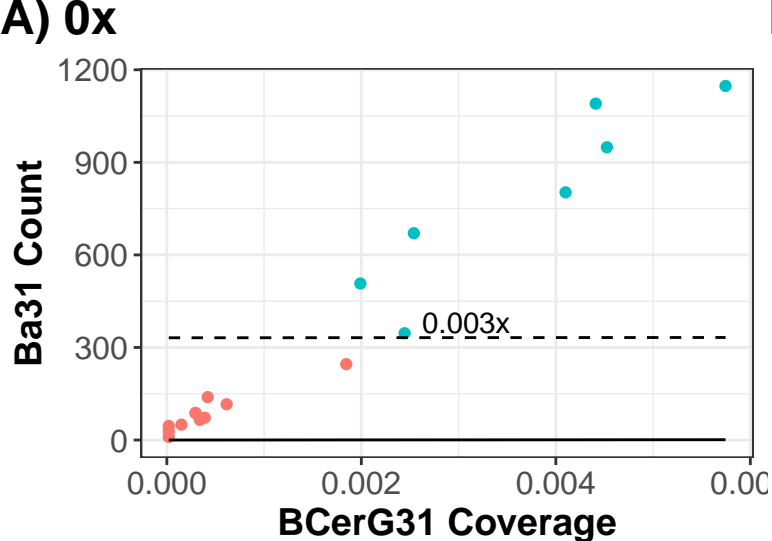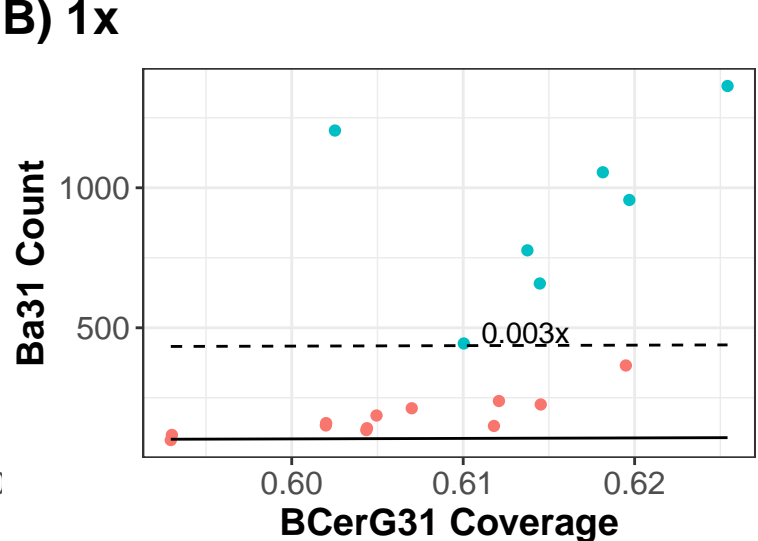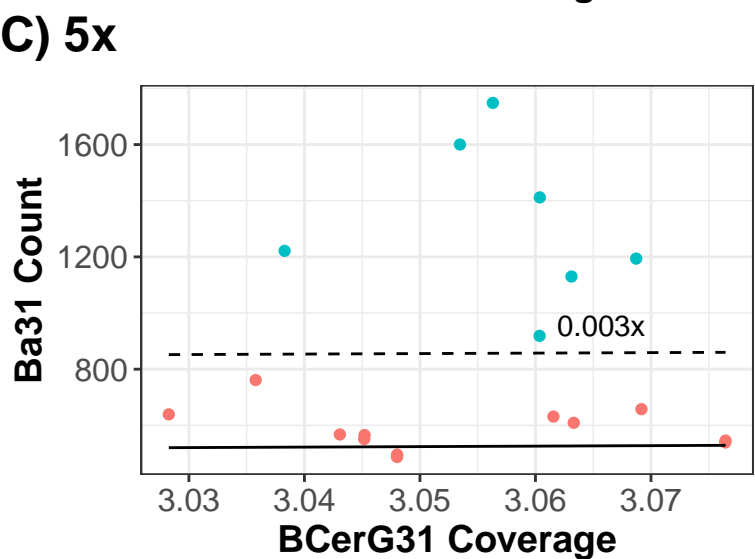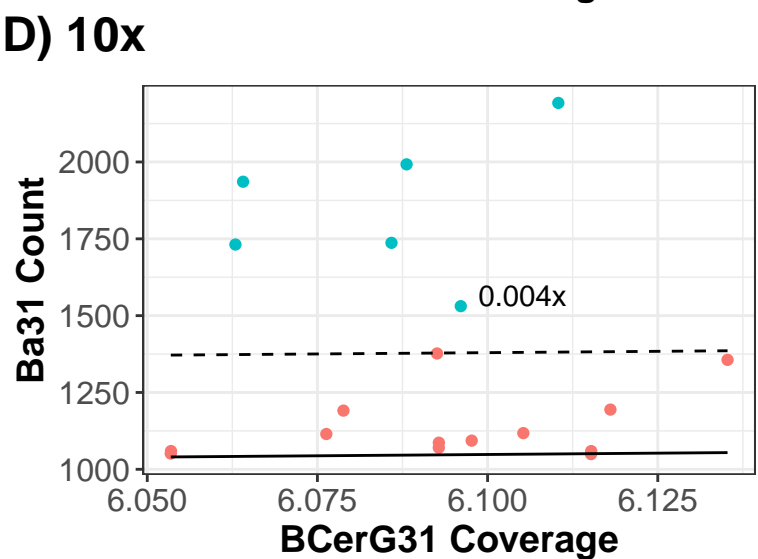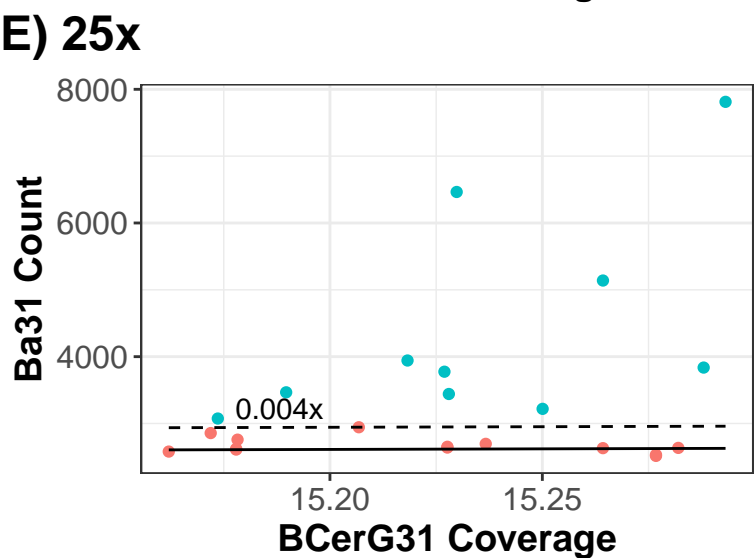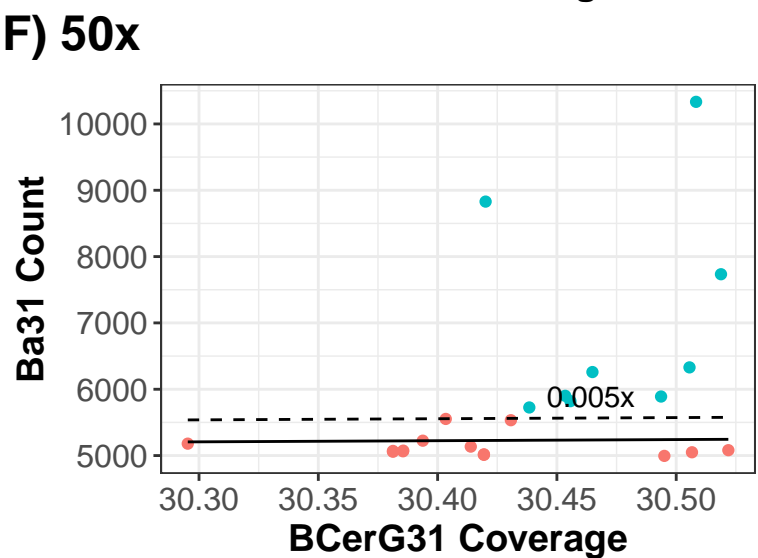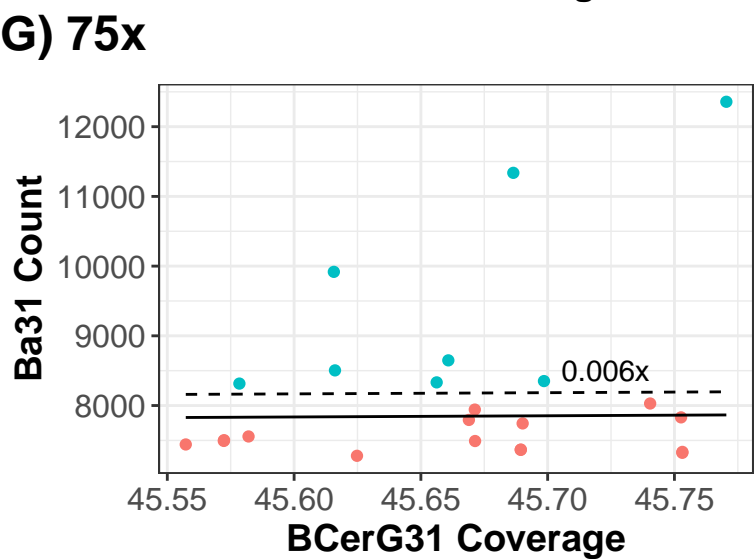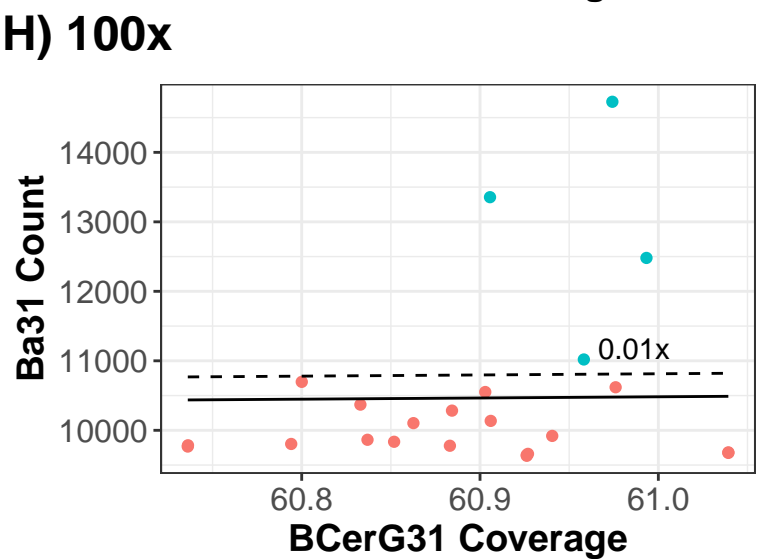

Ba31 Detectable FALSE TRUE
